# Supplementary material for: Cranial Anatomy of Wendiceratops pinhornensis gen. et sp. nov., a Centrosaurine Ceratopsid (Dinosauria: Ornithischia) from the Oldman Formation (Campanian), Alberta, Canada, and the Evolution of Ceratopsid Nasal Ornamentation
Source: PLoS One. 2015 Jul 8;10(7):e0130007. doi: 10.1371/journal.pone.0130007 (PMC4496092; doi:10.1371/journal.pone.0130007)
Supplement: S1 File — (XLSX) [file pone.0130007.s001.xlsx]

## Sheet: Sheet1
YEAR	GRID SQUARE	No.	FIELD #	Tyrrell Museum #	HIGHER TAXON	LOWER TAXON	ELEMENT	LENGTH (mm)	ORIENT (E of N)	DIP	DEPTH (mm)	COMPLETENESS/MODIFICATION	COMMENTS
2011			SSC2011-001	TMP2011.051.0001	Ceratopsidae	Centrosaurinae	squamosal						Found to connect with TMP 2011.051.0010
2011			SSC2011-002	TMP2011.051.0002	Ceratopsidae	Centrosaurinae	squamosal	240					part of left lateral ramus with 3 episquamosals
2011			SSC2011-003	TMP2011.051.0003	Ceratopsidae		vertebra	190					posterior cervical, missing transverse processes and neural spine
2011			SSC2011-004	TMP2011.051.0004	Ceratopsidae		vertebra (dorsal)	320					~D2; missing tips of vertebral processes
2011			SSC2011-004	TMP2011.051.0004B	Ceratopsidae		rib frag	210
2011	8A	2	SSC2011-005	TMP2011.051.0005	Ceratopsidae	Centrosaurinae	parietal frag						small lateroventral section found to connect to TMP 2011.051.0009
2011	5A	1	SSC2011-006	TMP2011.051.0006	Ceratopsidae		caudal vertebra	22					complete centrum
2011			SSC2011-007	TMP2011.051.0007	Ceratopsidae		bone frag
2011			SSC2011-008	TMP2011.051.0008	Ceratopsidae								skeleton from upper level, not mapped
2011	8A	3	SSC2011-009	TMP2011.051.0009	Ceratopsidae	Centrosaurinae	parietal						found to connect to TMP 2011.051.0005
2011			SSC2011-010	TMP2011.051.0010	Ceratopsidae	Centrosaurinae	squamosal						Found to connect with TMP 2011.051.0001
2011			SSC2011-011	TMP2011.051.0011	Ceratopsidae		vertebra (caudal)	230					not mapped, anterior caudal vertebrate; posterior half of centrum eroded
2011			SSC2011-012	TMP2011.051.0012	Ceratopsidae		jugal						not mapped
2011			SSC2011-013	TMP2011.051.0013	Ceratopsidae	Centrosaurinae	epoccipital						fragment, not mapped
2011			SSC2011-014	TMP2011.051.0014	Ceratopsidae	Centrosaurinae	squamosal						not mapped
2011			SSC2011-015	TMP2011.051.0015	Ceratopsidae		tendon						not mapped
2011			SSC2011-016	TMP2011.051.0016	Ceratopsidae		dentary						not mapped
2011			SSC2011-017	TMP2011.051.0017	Ceratopsidae		bone frag						not mapped
2011	9A		SSC2011-018	TMP2011.051.0018	Ceratopsidae		premaxilla frag						not mapped
2011			SSC2011-019	TMP2011.051.0019	Ceratopsidae	Centrosaurinae	parietal						approximate position on map
2011	9A	1	SSC2011-020	TMP2011.051.0020	Ceratopsidae		vertebra (dorsal)	280				missing neural spine and transverse processes
2011	10A	1	SSC2011-021	TMP2011.051.0021	Ceratopsidae		rib (dorsal)	370					~D3
2011	9B	1	SSC2011-022	TMP2011.051.0022	Ceratopsidae		caudal vertebra
2011			SSC2011-023	TMP2011.051.0023	Ceratopsidae		rostral	190				bady eroded
2011	2A	1	SSC2011-024	TMP2011.051.0024	Ceratopsidae		rib frag	260
2011	14A	1	SSC2011-025	TMP2011.051.0025	Ceratopsidae		vertebra (dorsal)					complete, but crushed
2011	8A	1	SSC2011-026	TMP2011.051.0026	Ceratopsidae	Centrosaurinae	ulna	460				complete, but crushed	right ulna, complete
2011	8B	1	SSC2011-027	TMP2011.051.0027	Ceratopsidae		neural arch (dorsal)						~D1
2011	3A	1	SSC2011-028	TMP2011.051.0028	Ceratopsidae		rib frag					badly erdoded
2011			SSC2011-029	TMP2011.051.0029	Ceratopsidae		rib (dorrsal)						~D8
2011	6A		SSC2011-030	TMP2011.051.0030	Ceratopsidae		bone frag
2011			SSC2011-031	TMP2011.051.0031	Ceratopsidae		bone frag						float
2011			SSC2011-032	TMP2011.051.0032	Ceratopsidae		bone frag						float
2011	5A	1	SSC2011-033	TMP2011.051.0033	Ceratopsidae		vertebra
2011	8B	2	SSC2011-034	TMP2011.051.0034	Ceratopsidae		chevron	142					half of proximal end from a large individual
2011			SSC2011-035	TMP2011.051.0035	Ceratopsidae		skull frag
2011	8A	4	SSC2011-036	TMP2011.051.0036	Ceratopsidae	Centrosaurinae	maxilla
2011	8A	4	SSC2011-037	TMP2011.051.0037	Ceratopsidae	Centrosaurinae	ischium					complete
2011	8B	5	SSC2011-038	TMP2011.051.0038	Ceratopsidae		rib (cervical)	550					~C8
2011	9A	2	SSC2011-039	TMP2011.051.0039	Ceratopsidae		rib (cervical)	380					~C7
2011	6A	2	SSC2011-040	TMP2011.051.0040	Ceratopsidae		vertebra (cervical)						~C8; missing neural spine and left transverse process
2011	6A	3	SSC2011-041	TMP2011.051.0041	Ceratopsidae		rib (dorsal)					almost complete
2011	4A		SSC2011-042	TMP2011.051.0042	Ceratopsidae		skull frag
2011			SSC2011-043	TMP2011.051.0043	Tyrannosauridae		tooth	18				complete crown
2011			SSC2011-044	TMP2011.051.0044	Ceratopsidae		rib frag	111					not mapped
2013			SSC2013-001	TMP2013.020.0001	Ceratopsidae		bone frag	70				k breaks on all sides, worn	part of cervical centrum?
2013			SSC2013-002	TMP2013.020.0002	Ceratopsidae		skull frag	130					not mapped
2013			SSC2013-003	TMP2013.020.0003	Tyrannosauridae		tooth frag	33					not mapped
2013	7C	1	SSC2013-004	TMP2013.020.0004	Adocidae		carapace frag	30		0	470		Adocus shell frag
2013	8C	6	SSC2013-005	TMP2013.020.0005	Ceratopsidae		tendon	41	0	0		fragment	cretaceous breaks
2013	5D	1	SSC2013-006	TMP2013.020.0006	Ceratopsidae	Centrosaurinae	squamosal	248	104	12W	650		section of left lateral ramus with eps and two episquamosals
2013	8C	3	SSC2013-007	TMP2013.020.0007	Ceratopsidae		tooth	18	54	0	270	crown complete	maxillary tooth
2013	8C	8	SSC2013-008	TMP2013.020.0008	Theropoda		limb frag	34	42	0	435	incomplete	fragment of a small hollow limb bone
2013	8C	7	SSC2013-009	TMP2013.020.0009	Ceratopsidae		tooth				340	incomplete	worn tooth
2013	8C	2	SSC2013-010	TMP2013.020.0010	Ceratopsidae		limb frag	165	130	37	330	incomplete
2013	8B	1	SSC2013-011	TMP2013.020.0011	Ceratopsidae		rib	212	21	20	435	incomplete	170 mm off to next grid 9B
2013	5D	2	SSC2013-012	TMP2013.020.0012	Ceratopsidae		vertebra (dorsal)	395	160	0	618	transverse process k-break	~D10; left side of centrum k-break
2013	8C	5	SSC2013-013	TMP2013.020.0013	Ceratopsidae		rib				500
2013	6D	1	SSC2013-014	TMP2013.020.0014	Ceratopsidae	Centrosaurinae	squamosal frag	120	92	90	614		fragment of otic notch region
2013	5D	3	SSC2013-015	TMP2013.020.0015	Ceratopsidae		tibia (juvenile)	240	120	0	605	Complete	right tibia from a small juvenile individual
2013	8C	1	SSC2013-016	TMP2013.020.0016	Ceratopsidae		jugal	195	95	26	340	incomplete	part of orbit rin, missing posterior flange
2013	7C	3	SSC2013-017	TMP2013.020.0017	Ceratopsidae		bone frag	30		0	574
2013	9C	5	SSC2013-018	TMP2013.020.0018	Ornithischia		bone frags			0
2013			SSC2013-019	TMP2013.020.0019	Ornithischia		tendon			0			not mapped, broken into pieces
2013	9C	3	SSC2013-020	TMP2013.020.0020	Ornithischia		limb frag	91	78	0	605	incomplete	part of shaft; from a juvenile individual
2013	9C	4	SSC2013-021	TMP2013.020.0021	Ceratopsidae		skull frag?	55		0
2013			SSC2013-022	TMP2013.020.0022	Ceratopsidae		tooth	20					dentary tooth; found above main bone layer
2013	7C	2	SSC2013-023	TMP2013.020.0023	Ceratopsidae		metapodial	80	440	0	456	incomplete and badly crushed
2013	9B	1	SSC2013-024	TMP2013.020.0024	Ceratopsidae		tendon frag	62	0	0	500		k breaks
2013	6D	4	SSC2013-025	TMP2013.020.0025	Ceratopsidae	Centrosaurinae	maxilla	245	170		625	K and recent breakage	posterior half of left maxilla, no teeth.
2013	5D	5	SSC2013-026	TMP2013.020.0026	Ceratopsidae		rib	480	172	0	625	Complete	Mid Dorsal rib, no damage
2013	7D	1	SSC2013-027	TMP2013.020.0027A	Ceratopsidae		rib	299	18	0	358
2013	7D		SSC2013-027	TMP2013.020.0027B	Ceratopsidae		rib	130					Collected with TMP2013.020.0027A; small and slender, potentially from a juvenile individual
2013	6D	3	SSC2013-028	TMP2013.020.0028	Ceratopsidae	Centrosaurinae	nasal frag	190	172	0	310	Internal nasal flange, all k-break	above main bone layer
2013	6D	2	SSC2013-029	TMP2013.020.0029	Ceratopsidae		skull frag	60		0	465
2013	5D	4	SSC2013-030	TMP2013.020.0030	Ceratopsidae		radius	410	178	0	630	Distal end complete	right radius, almost complete
2013	8B	3	SSC2013-031	TMP2013.020.0031	Ceratopsidae		vertebra (cervical)	250	0	0	500	complete	Centrum tilted to vertical on thin lateral edge. Tin foil ball maybe I8-2	posterior cervical
2013	6D	5	SSC2013-032	TMP2013.020.0032	Ceratopsidae		vertebra (dorsal)	240	136	0	375	Complete	~D8
2013			SSC2013-033	TMP2013.020.0033	Ceratopsidae		tendon frag	80		0			broken, in 2 pieces
2013			SSC2013-034	TMP2013.020.0034	Ceratopsidae		bone frag	180		0			vertebral centrum?
2013	6D	6	SSC2013-035	TMP2013.020.0035	Ceratopsidae	Centrosaurinae	squamosal	360	65	0	640		large porrtion of patholigcal left squamosal
2013	6D	10	SSC2013-036	TMP2013.020.0036	Ceratopsidae		radius	395	60	0	605		left radius, almost complete
2013	8C	12	SSC2013-037	TMP2013.020.0037	Ceratopsidae		centrum	65		0	570		well-worn
2013	10C	8	SSC2013-038	TMP2013.020.0038	Ceratopsidae		rib (dorsal)	300					~D3
2013	10C	7	SSC2013-039	TMP2013.020.0039	Ceratopsidae		rib (cervical)	380					~C9
2013	8D	1	SSC2013-040	TMP2013.020.0040	Ceratopsidae		vertebra (dorsal)	330					~D6; left transverse process missing
2013	5D	7	SSC2013-041	TMP2013.020.0041	Ceratopsidae		dorsal neural arch	250	180	0	680	Complete	~D3; right transverse process damaged; unfused neual arch
2013	5D	6	SSC2013-042	TMP2013.020.0042	Ceratopsidae		ungual	54	50	0	560	Complete	tip damaged during excavation
2013	6D	9	SSC2013-043	TMP2013.020.0043	Crocodila		scute	30			630	Frag
2013	8C	4	SSC2013-044	TMP2013.020.0044	Ceratopsidae		neural arch frag	60	40	55	440	incomplete
2013			SSC2013-045	TMP2013.020.0045	Ceratopsidae		tendon frag	46		0			not mapped
2013			SSC2013-047	TMP2013.020.0047	Ceratopsidae		caudal vertebra	54				incomplete	pathological centrum
2013	8C	9	SSC2013-048	TMP2013.020.0048	Ceratopsidae	Centrosaurinae	parietal midline	268	52	17	605	incomplete, k breaks on all incomplete margins	posterior margin
2013	8C	17	SSC2013-049	TMP2013.020.0049	Ceratopsidae		coracoid	310	20		695	exposed edge weathered	complete, right coracoid, from a large individual
2013	6D	12	SSC2013-050	TMP2013.020.0050	Ceratopsidae		rib (cervical)	470	30		700	head complete, no distal end	~C8
2013	7D	7	SSC2013-051	TMP2013.020.0051	Ceratopsidae		fibula	475	20		705	incomplete	left fibula missing distal end
2013	7D	6	SSC2013-052	TMP2013.020.0052	Ceratopsidae		tendon	110			0		in pieces
2013	8C	18	SSC2013-053	TMP2013.020.0053	Ornithischia		rib frag	110	140		605
2013	6E	3	SSC2013-054	TMP2013.020.0054	Ceratopsidae		bone frag	80			660		scrap float
			SSC2013-055	TMP2013.020.0055	Gar		scale	10					complete scale
2013			SSC2013-056	TMP2013.020.0056	Gar		scale	20					found in float above main bone layer
2013	7D	3	SSC2013-057	TMP2013.020.0057	Ceratopsidae		bone frag	30
2013	6E	1	SSC2013-058	TMP2013.020.0058	Ceratopsidae		quadrate	223 (289)	40		340
2013	6E	2	SSC2013-059	TMP2013.020.0059	Ceratopsidae		squamosal frag	121	122	20	258		patholoical piece of otic notch area
2013	8D	1	SSC2013-060	TMP2013.020.0060	Ceratopsidae		vertebra (sacral)	240					two fused posterior sacrals
2013	6B	13	SSC2013-061	TMP2013.020.0061	Ceratopsidae	Centrosaurinae	parietal	180					pathological fragment with one epimarginal; preserves squamosal contact?
2013	7D	8	SSC2013-062	TMP2013.020.0062	Ceratopsidae		surangular	180	55			complete, but crushed	right surangular, data on map
2013	7D		SSC2013-062	TMP2013.020.0062B	Ceratopsidae		bone frag	110					not mapped, collected with TMP2013.020.0062
2013	7D	9	SSC2013-063	TMP2013.020.0063	Ceratopsidae		skull frag	70	92				bagged- not mapped
2013	7D	10	SSC2013-064	TMP2013.020.0064	Ornithischia		rib frag		160				data on map
2013	7D	2	SSC2013-065	TMP2013.020.0065	Ceratopsidae		vertebra	195	25		525		incomplete, crushed centrum
2013	8D	2	SSC2013-066	TMP2013.020.0066	Ceratopsidae		skull frag						No data
2013	7D	5	SSC2013-067	TMP2013.020.0067	Ceratopsidae		rib frag	65		0	365
2013	8D	3	SSC2013-068	TMP2013.020.0068	Ornithischia		bone frags	140	136		300
2013	7D	4	SSC2013-069	TMP2013.020.0069	Ceratopsidae		bone frag
2014			SSC2014-001	TMP2014.029.0001	Ceratopsidae		surangular frag	100				incomplete	not mapped
2014	8D	6	SSC2014-002	TMP2014.029.0002	Ceratopsidae		skull frag	60	174		520		standing on thin edge
2014	8D	5	SSC2014-003	TMP2014.029.0003	Ceratopsidae		neural arch frag	70	22		520		caudal vertebral arch
2014	8D	4	SSC2014-004	TMP2014.029.0004	Ceratopsidae		bone frag	35			510	k-break, worn frag.
2014	8D	2	SSC2014-005	TMP2014.029.0005	Ceratopsidae		tooth	30			460	damage to carina	dentary tooth; has large vertcal shearing surface
2014			SSC2014-006	TMP2014.029.0006	Ceratopsidae		tendon frag	25					broken frag
2014			SSC2014-007	TMP2014.029.0007	Ornithischia		rib frag	100
2014	5E		SSC2014-008	TMP2014.029.0008	Ceratopsidae		maxilla frag	62				k breaks on all sides	frag from posterior part of toothrow
2014	8D		SSC2014-009	TMP2014.029.0009	Ceratopsidae		tendon frag	65				k-break both ends	found under paritetal hook in 5D
2014			SSC2014-010	TMP2014.029.0010	Ceratopsidae	Centrosaurinae	nasal frag	100				k-break all sides
			SSC2014-011	TMP2014.029.0011	Ceratopsidae		caudal vertebra	10					distal caudal centrum
2014	7D	1	SSC2014-012	TMP2014.029.0012	Ceratopsidae		skul frag	80	148		550	k-break all sides
2014	9D		SSC2014-013	TMP2014.029.0013	Ornithischia		tendon frag	75					not mapped
2014			SSC2014-014	TMP2014.029.0014	Ceratopsidae		skull frag	45
2014	8D	3	SSC2014-015	TMP2014.029.0015	Ceratopsidae	Centrosaurinae	parietal frag	180	135		490	k-break all sides	standing on thin edge; preserves part of posterior midline and EP1 process
2014	6E	1	SSC2014-016	TMP2014.029.0016	Ceratopsidae	Centrosaurinae	parietal frag	190	115		330	modern weathering and k breaks	misidentified in field as postorbital fragment
2014	7E	1	SSC2014-017	TMP2014.029.0017A	Ceratopsidae		vertebra (caudal)	225	115		405	complete	~C1; lying on front face of centrum, centrum powdery
2014	7E		SSC2014-017	TMP2014.029.0017B	Ceratopsidae		cervical rib	68					shaft of cervical rib?
2014	8D	1	SSC2014-018	TMP2014.029.0018	Ceratopsidae		rib frag	155	43		410	k-break both ends	small section of shaft
2014			SSC2014-019	TMP2014.029.0019	Ornithischia		bone frag	80
2014			SSC2014-020	TMP2014.029.0020	Ornithischia		tendon frag	15
2014	7D	4	SSC2014-021	TMP2014.029.0021	Ceratopsidae		tooth	20			415	k-break
2014	9C	1	SSC2014-022	TMP2014.029.0022	Ceratopsidae		centrum	82			400	no neural arch & spine
2014	8D	8	SSC2014-023	TMP2014.029.0023	Ceratopsidae		bone frag	80			140
2014	5D	1	SSC2014-024	TMP2014.029.0024	Ceratopsidae		rib	280	125	43N	390	k-break both ends	section of shaft
2014	7D	2	SSC2014-025	TMP2014.029.0025	Ceratopsidae		limb frag	260			540		femur frag?
2014	8D	7	SSC2014-026	TMP2014.029.0026	Ceratopsidae		rib (dorsal)	415	0		520		mid-dorsal rib
2014	9C	2	SSC2014-027	TMP2014.029.0027	Ceratopsidae		caudal vertebra	160			580	missing left caudal rib	~C4
2014	9C		SSC2014-028	TMP2014.029.0028	Plantae		amber						small amber frags
2014	6D		SSC2014-029	TMP2014.029.0029	Plantae		amber						small amber frags
2014	8D	15	SSC2014-030	TMP2014.029.0030	Ceratopsidae		tooth	12			350		fragment of tooth crown
2014	8D	13	SSC2014-031	TMP2014.029.0031	Ornithischia		limb frag	85			310
2014	8D	10	SSC2014-032	TMP2014.029.0032	Ceratopsidae		neural arch frag	45		58N	420
2014	6E	2	SSC2014-033	TMP2014.029.0033	Ornithischia		bone frag	85			500
2014	8D	9	SSC2014-034	TMP2014.029.0034	Ceratopsidae		limb frag	100			460		peel of cortex
2014	8D	14	SSC2014-035	TMP2014.029.0035	Ornithischia		rib frag	260	165	20S	450
2014	5D	2	SSC2014-036	TMP2014.029.0036	Ceratopsidae		rib head (dorsal)	220	145	10N	450	k-break both ends	~D7
2014	4D	1	SSC2014-037	TMP2014.029.0037	Ornithischia		bone frag	25			430	k-break both ends
2014			SSC2014-038	TMP2014.029.0038	Plantae		seed	40					unmapped; found in float above bone layer
2014	7D	5	SSC2014-039	TMP2014.029.0039	Ceratopsidae		vertebra (cervical)	260	185		580	complete	posterior cervical, just missing tip of neural spine
2014			SSC2014-040	TMP2014.029.0040	Plantae		amber						small amber frags
2014	8D		SSC2014-041	TMP2014.029.0041	Plantae		amber						small amber frags
2014	8D	16	SSC2014-042	TMP2014.029.0042	Ceratopsidae		tooth	12			530		Well worn frags (2)
			SSC2014-043	TMP2014.029.0043	Ceratopsidae		tooth	8					well-work fragment
2014	9D	1	SSC2014-044	TMP2014.029.0044	Ornithischia		tendon	40	35		470
2014	E6		SSC2014-045	TMP2014.029.0045	Plantae
2014	8D		SSC2014-046	TMP2014.029.0046	Plantae		amber						small piece of amber
2014	8D	17	SSC2014-047	TMP2014.029.0047	Ornithischia		chevron frag	32			620
2014	6E	5	SSC2014-048	TMP2014.029.0048	Ceratopsidae		skull frag	79			480
2014	6E	3	SSC2014-049	TMP2014.029.0049	Ceratopsidae		bone frag	90			500	k-break	skull frag?
2014	6E		SSC2014-050	TMP2014.029.0050	Ceratopsidae		skull frag	37					unmapped
2014	8D	18	SSC2014-051	TMP2014.029.0051	Gar		scale	15			650
2014	8D	19	SSC2014-051	TMP2014.029.0051	Gar		scale	12			650
2014	8D	20	SSC2014-051	TMP2014.029.0051	Gar		skull element	30			650
2014	6E	4	SSC2014-052	TMP2014.029.0052	Ceratopsidae		skull frag	50			420	k-break
2014	5E	1	SSC2014-053	TMP2014.029.0053	Ceratopsidae		vertebra (caudal)	60			520		distal caudal; eroded centrum
2014	8E	1	SSC2014-054	TMP2014.029.0054	Ceratopsidae		bone frag	170			220		potentially frill?
2014	5E	2	SSC2014-055	TMP2014.029.0055	Ceratopsidae		rib frag	185	70		350	k-break, tooth marks
2014	5E	3	SSC2014-056	TMP2014.029.0056	Ceratopsidae		vertebra	170	55		410		posterior cervical, almost complete
2014	9C	3	SSC2014-057	TMP2014.029.0057	Ceratopsidae		rib	285	80	47E	590	incomplete shaft	dorsal rib
2014	8D	11	SSC2014-058	TMP2014.029.0058	Ceratopsidae	Centrosaurinae	ulna	440	310		540	complete	right ulna, medial side up
2014	9D	2	SSC2014-059	TMP2014.029.0059	Ceratopsidae		tooth	19					closely located to maxilla
2014	9D	3	SSC2014-060	TMP2014.029.0060	Ceratopsidae		tooth	13
2014	9D	4	SSC2014-061	TMP2014.029.0061	Ceratopsidae		tooth	22					Complete maxillary tooth with double root
2014	9D	5	SSC2014-062	TMP2014.029.0062	Ceratopsidae		predentary frag						very small fragment
2014	5E	4	SSC2014-063	TMP2014.029.0063	Trionychidae		shell fragment	25			560	k-break	Trionychidae
			SSC2014-064	TMP2014.029.0064	Plantae		amber						small amber pieces
2014	9D		SSC2014-065	TMP2014.029.0065	Ceratopsidae		tendon	25					tendon frag
2014			SSC2014-066	TMP2014.029.0066	Gar		scale	5
2014	5D	5	SSC2014-067	TMP2014.029.0067	Ceratopsidae		premaxilla frag	190	30	9N	620		in two pieces
2014	9C	8	SSC2014-068	TMP2014.029.0068	Ornithischia		bone frag	110	100	24W	490
2014	9D	14	SSC2014-069	TMP2014.029.0069	Ornithischia		bone frag	52			430
2014	9D	6	SSC2014-070	TMP2014.029.0070	Ornithischia		tendon	230	40	27S	420		in two closely associted pieces that likely were together
2014	9D	7	SSC2014-071	TMP2014.029.0071	Ornithischia		rib	375	50		550
2014	9D	9	SSC2014-072	TMP2014.029.0072	Ceratopsidae		tibia (juvenile)	240	25		290	complete	left tibia from a small juvenile individual
2014	6E	6	SSC2014-073	TMP2014.029.0073	Ceratopsidae		cervical rib?	110	175		460
2014	9D	8	SSC2014-074	TMP2014.029.0074	Ceratopsidae	Centrosaurinae	maxilla	350			270	complete	right maxilla with teeth
2014	5D	3	SSC2014	TMP2014.029.0075	Ceratopsidae		rib (dorsal)	480	343		620	k-break
2014	5D	4	SSC2014-076	TMP2014.029.0076	Ceratopsidae		rib (dorsal)	300				tooth marked
2014	5E		SSC2014-077	TMP2014.029.0077	Ceratopsidae		tendon frag	40
2014	9D	15	SSC2014-078	TMP2014.029.0078	Ceratopsidae		skull frag	80			630
2014			SSC2014-079	TMP2014.029.0079	Gastropoda		skull	20					Example of a complete shell
2014			SSC2014-80	TMP2014.029.0080	Adocidae		shell fragment	10					found in float above main bone layer
2014	9D	6	SSC2014-081	TMP2014.029.0081	Ornithischia		bone frag	55					Could be part of rib TMP 2014.029.0070?
2014	7E	2	SSC2014-082	TMP2014.029.0082	Ornithischia		rib frag	100	8		8
2014	8E	3	SSC2014-083	TMP2014.029.0083	Ceratopsidae		neural arch frag	95			480		paired dorsal prezygaphyses
2014	9C	8	SSC2014-084	TMP2014.029.0084	Ornithischia		bone frag	110
2014	9D	16	SSC2014-085	TMP2014.029.0085	Ornithischia		bone frag	100	73		510
2014	9C	10	SSC2014-086	TMP2014.029.0086	Ceratopsidae	Centrosaurinae	nasal frag	90	85	33N	500
2014	9C	4	SSC2014-087	TMP2014.029.0087	Ceratopsidae		dentary frag	230	150	90	400		posterior section below coronoid
2014	9C			TMP2014.029.0087B	Ceratopsidae		tooth	35			400		complete maxillary tooth with root
2014	9C	9	SSC2014-088	TMP2014.029.0088	Ceratopsidae		vertebra (caudal)	220	215	12W	570		~C3; pathological centrum
2014	9D		SSC2014-089	TMP2014.029.0089	Ceratopsidae		tooth	20					complete maxillary tooth crown, unworn, missing root
2014	4D		SSC2014-090	TMP2014.029.0090	Ceratopsidae		skull frag	90
2014			SSC2014-091	TMP2014.029.0091	Ornithischia		rib frag	62
2014	8E	4	SSC2014-092	TMP2014.029.0092	Ceratopsidae		bone frag	140	150		600
2014	6E	7	SSC2014-093	TMP2014.029.0093	Ceratopsidae		rib (cervical)	130	31	84	450	Complete	~C6, dipping to perpendicular to long axis
2014	4D	2	SSC2014-094	TMP2014.029.0094	Ceratopsidae	Centrosaurinae	parietal	230			500
2014	9D	17	SSC2014-095	TMP2014.029.0095	Ceratopsidae	Centrosaurinae	maxilla	290			530	k-break, green fracture?	left maxilla with teeth
2014	9C	5	SSC2014-096	TMP2014.029.0096	Ceratopsidae		vertebra (dorsal)	380	255	34E	530	complete, crushed
2014	9C	7	SSC2014-097	TMP2014.029.0097	Ceratopsidae	Centrosaurinae	parietal frag	220			580		smal section of the posterior bar with 2 epiparietals
2014	9D	13	SSC2014-98	TMP2014.029.0098	Ceratopsidae		illium	560	85	22N	490		bone covered with matrix, flat and thin, one side is spongy
2014	9D			TMP2014.029.0098B	Ceratopsidae		pelvic frag?	170					found with ilium TMP 2014.029.0098
2014			SSC2014-99	TMP2014.029.0099	Ceratopsidae		tooth	10					fragment of tooth crown
2014	5E	6	SSC2014-100	TMP2014.029.0100	Ceratopsidae		humerus	560	80		640	k-break on proximal end	left humerus, incomplete; minimum shaft circumference=297mm
2014	5E	7	SSC2014-101	TMP2014.029.0101	Ceratopsidae		humerus (head)	176			690	proximal head, k breaks on all sides	found to fit together with TMP 2014.029.0100
2014	5E	8	SSC2014-102	TMP2014.029.0102	Ceratopsidae		frill frag	110			670
2014	5E	5	SSC2014-103	TMP2014.029.0103	Ceratopsidae		rib (dorsal)	445	50		690		~D4
2014	9D	18	SSC2014-104	TMP2014.029.0104	Ceratopsidae		fibula	480				k-breaks both ends	incomplete, missing the both ends
2014	9D		SSC2014-104A	TMP2014.029.0104A	Ceratopsidae		exoccipital	70					left exoccipital frag from a juvenile individual
2014			SSC2014-105	TMP2014.029.0105	Ceratopsidae		neural arch frag	80					unmapped
2014	4D		SSC2014-106	TMP2014.029.0106	Ceratopsidae		skull frag?	105
2014	8E	2	SSC2014-107	TMP2014.029.0107	Ceratopsidae		rib (dorsal)	280	53	35	400		~D11
2014	8E			TMP2014.029.0107B	Ceratopsidae		skull frag?	60
2014	8D	12	SSC2014-108	TMP2014.029.0108	Plantae		amber	25			140		small amber frags
